# Instructions for Obtaining Anesthesiology Continuing Medical Education (CME) Credit

CME Editors: Leslie C. Jameson, M.D., and Dan J. Kopacz, M.D.

ANESTHESIOLOGY'S Journal CME is open to all readers. To take part in ANESTHESIOLOGY Journal-based CME, complete the following steps:

1. Read the accreditation information presented on this page.
2. Read this month's articles designated for credit (listed below) in either the print or online edition.
3. Register at <http://www.asahq.org/shop-asa>. In the category, search for Journal CME. Nonmembers will need to provide payment.
4. Achieve a score of at least 50% correct on the six-question online journal quiz and complete the evaluation.
5. Claim credit in 15-minute increments, for a maximum of 1 *AMA PRA Category 1 Credit*<sup>™</sup> per journal article.

## Accreditation Information

**Purpose:** The focus of ANESTHESIOLOGY Journal-based CME is to educate readers on current developments in the science and clinical practice of anesthesiology.

**Target Audience:** ANESTHESIOLOGY Journal-based CME is intended for anesthesiologists. Researchers and other healthcare professionals with an interest in anesthesiology may also participate.

**Accreditation and Designation Statements:** The American Society of Anesthesiologists is accredited by the Accreditation Council for Continuing Medical Education to provide continuing medical education for physicians.

The American Society of Anesthesiologists designates this journal-based activity for a maximum of 1 *AMA PRA Category 1 Credit*<sup>™</sup>. Physicians should claim only the credit commensurate with the extent of their participation in the activity.

Maintenance of Certification in Anesthesiology<sup>™</sup> program and MOCA<sup>®</sup> are registered trademarks of The American Board of Anesthesiology<sup>®</sup>. MOCA 2.0<sup>®</sup> is a trademark of the American Board of Anesthesiology<sup>®</sup>.

This activity contributes to the CME component of the American Board of Anesthesiology's redesigned Maintenance of Certification in Anesthesiology<sup>™</sup> (MOCA<sup>®</sup>) program, known as MOCA 2.0<sup>®</sup>. Please consult the ABA website, <http://www.theABA.org>, for a list of all MOCA 2.0 requirements.

## Rates

Two options are available:

|            | ASA Member | Non-member |
|------------|------------|------------|
| Annual Fee | \$0        | \$120      |

Payment may be made using Visa or MasterCard.

Please direct any questions about Journal-based CME to: [EducationCenter@asahq.org](mailto:EducationCenter@asahq.org)

**Date of Release: March 2020**

**Expiration Date: March 2023**

## This Month's Anesthesiology Journal-based CME Articles

Read the article by Goel *et al.* entitled "Cannabis Use Disorder and Perioperative Outcomes in Major Elective Surgeries: A Retrospective Cohort Analysis" on page 625 and the article by Abdallah *et al.* entitled "Subomohyoid Anterior Suprascapular Block *versus* Interscalene Block for Arthroscopic Shoulder Surgery: A Multicenter Randomized Trial" on page 839.

## Learning Objectives

After successfully completing this activity, the learner will be able to recognize the possibility of encountering a perioperative patient with active cannabis use disorder, identify the risk of perioperative morbidity and mortality in patients with active cannabis use disorder, and recognize the ultrasound localization and efficacy of the subomohyoid approach to block the suprascapular nerve in the supraclavicular fossa.

## Disclosures

These journal articles have been selected for and planned as a journal CME activity, which is designated for *AMA PRA Category 1 Credit*<sup>™</sup>. The authors disclosed relationships in keeping with ANESTHESIOLOGY'S requirements for all journal submissions. All relationships journal authors disclosed to ANESTHESIOLOGY are disclosed to learners, even those relationships that are not relevant financial relationships, per the ACCME'S requirements for CME activities.

**Editor-in-Chief:** Evan D. Kharasch, M.D., Ph.D., has disclosed no relevant financial relationships with commercial interests.

**CME Editors:** Leslie C. Jameson, M.D., has disclosed no relevant financial relationships with commercial interests. Dan J. Kopacz, M.D., has disclosed holding an equity position with SoloDex, Inc.

**ASA Staff:** Kari Lee and Anne Farace have disclosed no relevant financial relationships with commercial interests.

## Disclaimer

The information provided in this activity is for continuing education purposes only and is not meant to substitute for the independent medical judgment of a healthcare provider relative to diagnostic and treatment options of a specific patient's medical condition.

DOI: 10.1097/ALN.0000000000003247
